# Supplementary material for: Plasmonic aptamer–gold nanoparticle sensors for small molecule fingerprint identification
Source: Royal Society of Chemistry journal article supplement (doi:10.1039/c4an01376j), 2014-01-01
Supplement: c4an01376j1.pdf [file c4an01376j1.pdf]

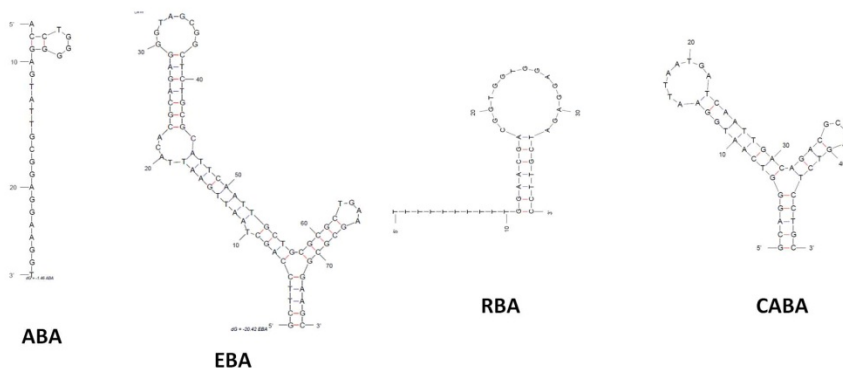

**Figure S1.** Mfold predicted structures of DNA aptamers used in this study. Notice that mfold did not predict the experimentally observed structures for ABA (pseudohelix) and RBA (G-quartet). Structures were folded at 25 °C, 5 mM NaCl, 1 mM MgCl<sub>2</sub>, to mimic our experimental conditions.

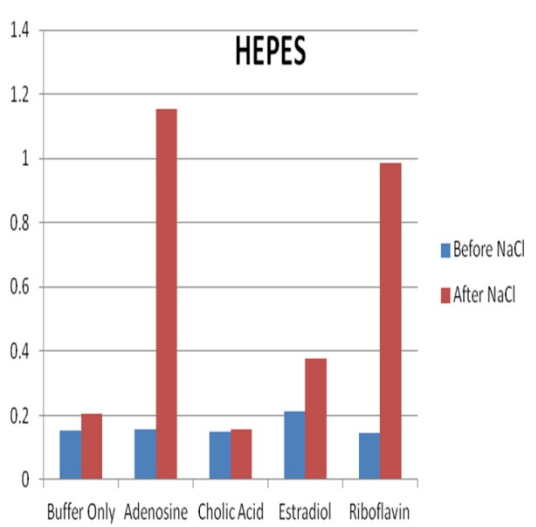

**Figure S2.** Citrate-stabilized AuNPs aggregation in the presence of different analytes. AuNPs were suspended in 10 mM HEPES, 1 mM MgCl<sub>2</sub>, pH 7.4 (HEPES buffer). AuNPs aggregation degree before (blue bars) and after (red bars) NaCl addition a mixture of 90  $\mu$ L AuNPs in HEPES buffer and 10  $\mu$ L of 180  $\mu$ M different analytes dissolved in HEPES buffer.

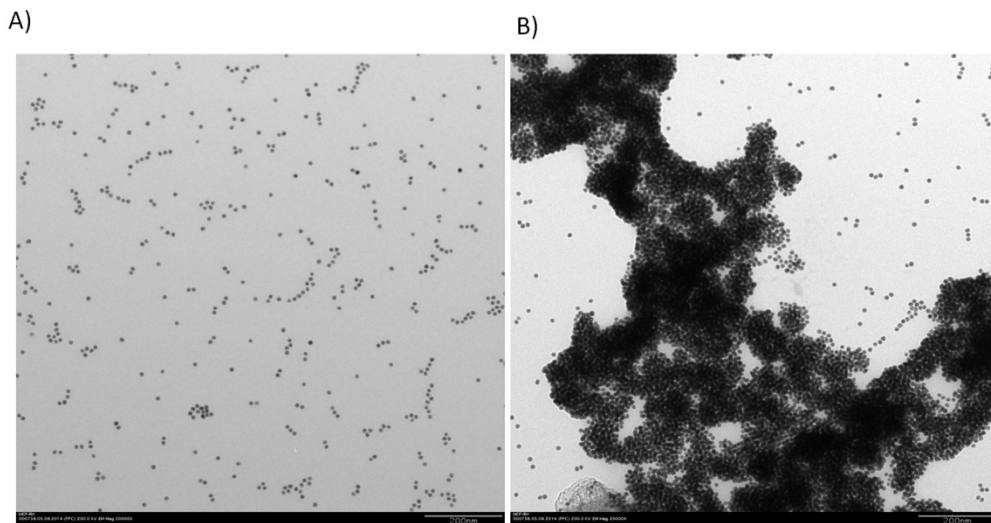

Figure S3. TEM images of ABA-AuNPs. Images showed the aggregation of ABA-AuNPs exposed to A): buffer and B) adenosine (20  $\mu\text{M}$ ), after addition of NaCl.

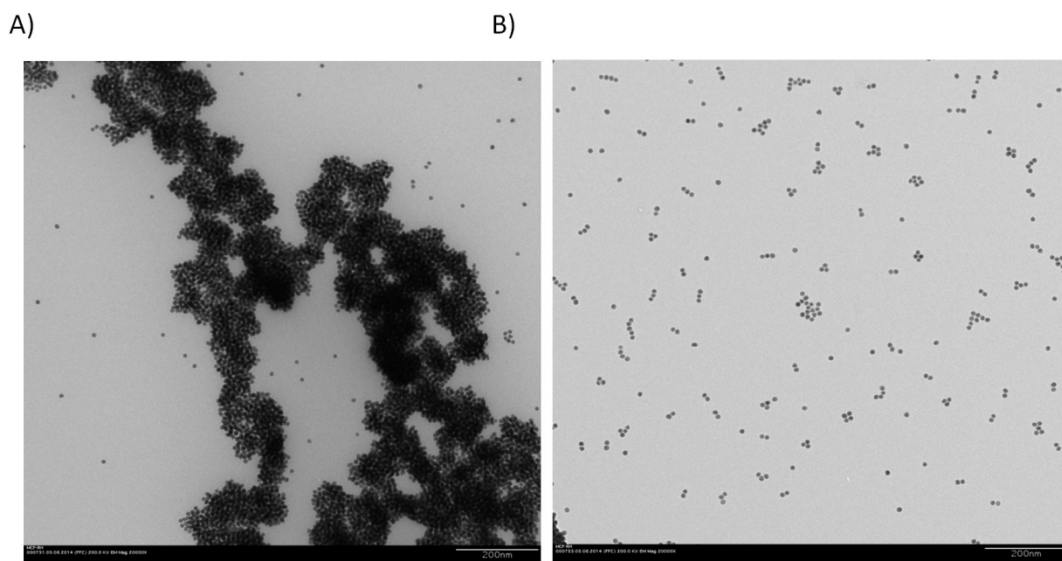

Figure S4. TEM images of CABA-AuNPs. Images showed the aggregation of CABA-AuNPs exposed to A): buffer and B) cholic acid (50  $\mu\text{M}$ ), after addition of NaCl.

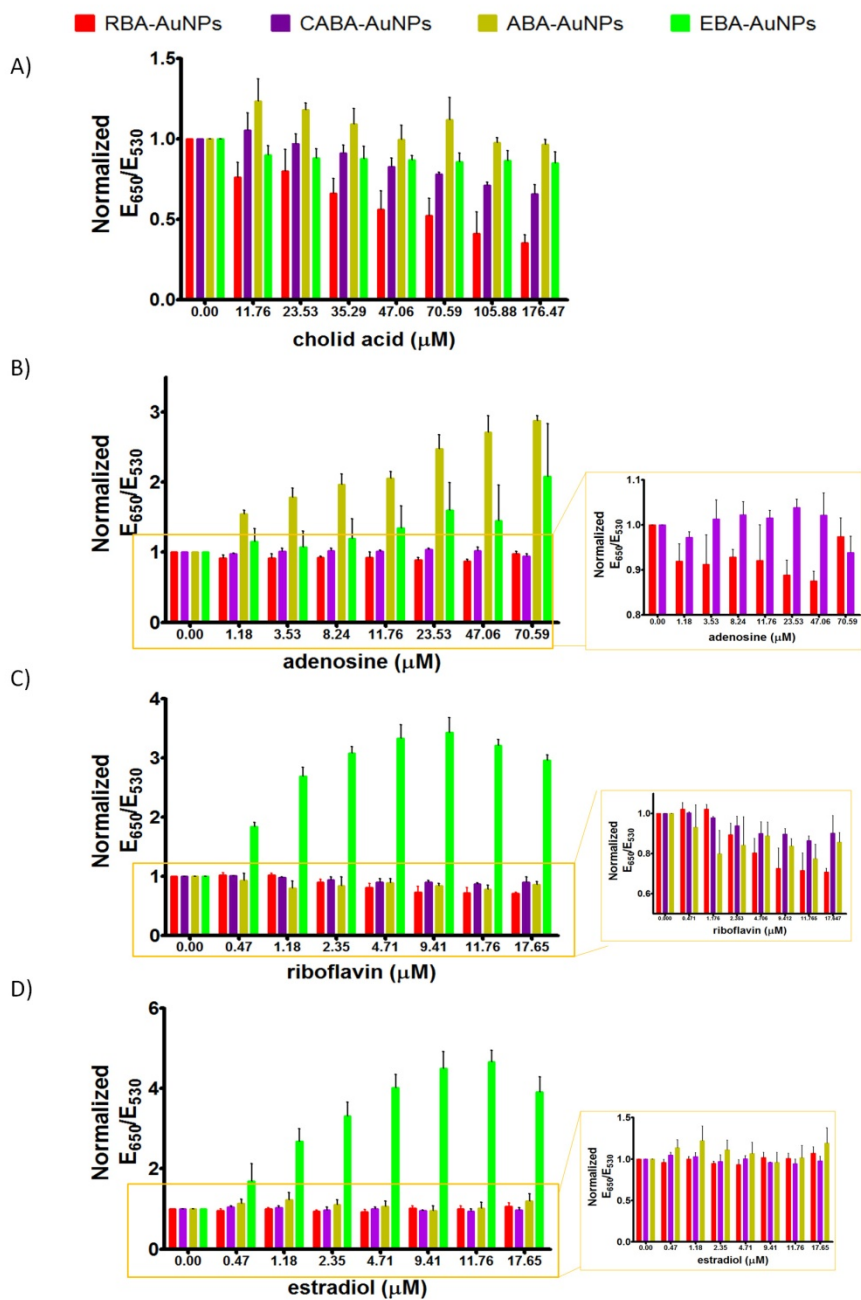

Figure S5. Fingerprint data analysis. The responses from the four Apt-AuNPs designed in this work were combined to obtain a fingerprint per analyte studied. Insets show the “stabilization effect” that allowed a more efficient analyte differentiation.

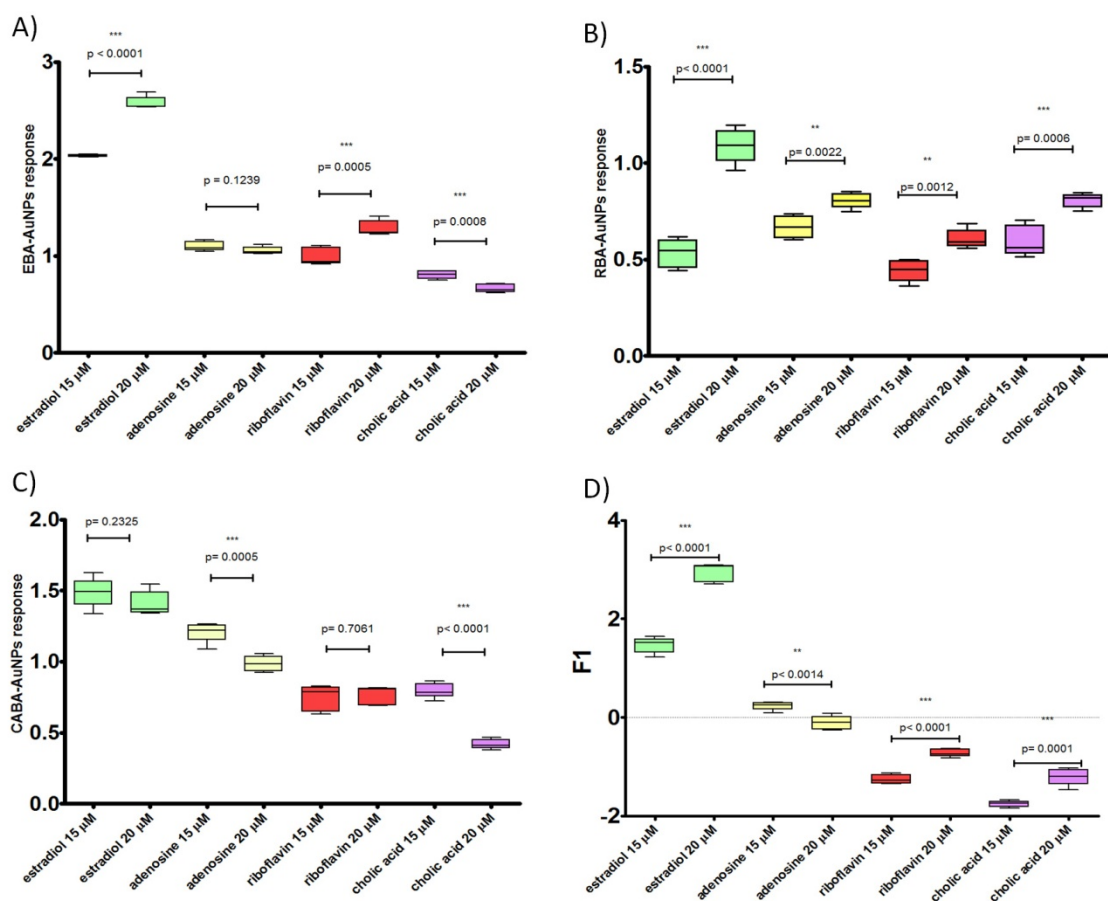

Figure S6. T-test analysis. The Apt- AuNPs response was further analyzed to determine the statistical differences of the output obtained with the analytes at different concentrations. The results are presented in Figure S6. Each plot shows the results of one Apt-AuNP exposed to each analyte at two different concentrations. These two values were analyzed using the t-test. It was observed that, in most cases, a statistically different response was obtained. Analysis of the output per Apt-AuNPs has limited practical relevance since it was established in this work that the combined response of the sensors provides a superior means for analyte identification and quantification. Therefore the PCA output was analyzed in a similar manner, comparing the first principal component of each sensor. Figure S6 D shows that in all cases the responses observed with different concentrations of the same target were significantly different, confirming the superior analytical performance when the Apt-AuNPs were used as cross-reactive sensors.

**Table S1**

| <b>CABA-AuNPs</b>     | peak 1      |          |           | peak 2      |          |           | <b>Zav</b>  | <b>PDI</b> |           |            |            |
|-----------------------|-------------|----------|-----------|-------------|----------|-----------|-------------|------------|-----------|------------|------------|
|                       | <b>size</b> | <b>%</b> | <b>SD</b> | <b>size</b> | <b>%</b> | <b>SD</b> |             |            |           |            |            |
| blank no salt         | 15.76       | 93       | 5.95      | 368         | 6.8      | 120       | 16.74       | 0.191      |           |            |            |
| blank + 300 mM NaCl   | 251.7       | 87.1     | 66.72     | 82.59       | 12.9     | 125.5     | 181         | 0.244      |           |            |            |
| 50 uM CA+ 300 mM NaCl | 101.8       | 73.11    | 61.6      | 16.98       | 26.9     | 13.31     | 47.69       | 0.512      |           |            |            |
|                       |             |          |           |             |          |           |             |            |           |            |            |
| <b>EBA-AuNPs</b>      | peak 1      |          |           | peak 2      |          |           | peak 3      |            |           | <b>Zav</b> | <b>PDI</b> |
|                       | <b>size</b> | <b>%</b> | <b>SD</b> | <b>size</b> | <b>%</b> | <b>SD</b> | <b>size</b> | <b>%</b>   | <b>SD</b> |            |            |
| blank no salt         | 18.63       | 94.1     | 6.02      | 4.94        | 2.6      | 0.54      | 4152        | 3.3        | 1024      | 16.75      | 0.192      |
| blank + 172 mM NaCl   | 88.66       | 50.3     | 28.27     | 16.57       | 41.3     | 3.24      | 1490        | 8.4        | 612.5     | 32.84      | 0.479      |
| 5 uM Est+ 172 mM NaCl | 87.97       | 77.5     | 21.19     | 17.75       | 22.5     | 2.172     |             |            |           | 50.94      | 0.444      |

#### Apt-AuNP Size Analysis by Dynamic Light Scattering.

Apt-AuNPs were prepared as described in the experimental section. Samples were analyzed in a Zetasizer Nano Instrument (Malvern Instruments, Westborough, MA) utilized in backscatter mode (173 ° detection angle) with the temperature set at 20.0 °C. Apt-AuNPs (75 µL) were mixed with 10 µL of assay buffer (blank) or the analyte of interest in assay buffer and incubated for one minute. This was followed by NaCl addition (exact concentrations are listed on Table S1), and after another one-minute incubation, the size was determined by DLS.

**Table S2.** Data utilized for PCA analysis

|               | ABA      | EBA      | RBA      | CABA     |
|---------------|----------|----------|----------|----------|
| buffer 1      | 0.265957 | 0.239474 | 0.275401 | 0.501433 |
| buffer 2      | 0.270053 | 0.248    | 0.268617 | 0.52149  |
| buffer 3      | 0.281501 | 0.257979 | 0.308108 | 0.480114 |
| buffer 4      | 0.284211 | 0.255937 | 0.272727 | 0.52071  |
| buffer 5      | 0.265416 | 0.248021 | 0.259259 | 0.530259 |
| estradiol 1   | 0.579387 | 0.667638 | 0.298343 | 0.74772  |
| estradiol 2   | 0.574586 | 0.663768 | 0.312668 | 0.737805 |
| estradiol 3   | 0.589385 | 0.649718 | 0.321716 | 0.742424 |
| estradiol 4   | 0.555241 | 0.637883 | 0.296    | 0.697605 |
| estradiol 5   | 0.571429 | 0.628571 | 0.290667 | 0.725076 |
| adenosine 1   | 0.289817 | 0.267532 | 0.241558 | 0.511364 |
| adenosine 2   | 0.299479 | 0.260982 | 0.221932 | 0.461957 |
| adenosine 3   | 0.291777 | 0.264935 | 0.228792 | 0.495798 |
| adenosine 4   | 0.263708 | 0.239401 | 0.23057  | 0.480226 |
| adenosine 5   | 0.278947 | 0.253071 | 0.226221 | 0.5      |
| riboflavin 1  | 0.219321 | 0.315508 | 0.155844 | 0.404372 |
| riboflavin 2  | 0.220472 | 0.307278 | 0.158442 | 0.382514 |
| riboflavin 3  | 0.218182 | 0.320955 | 0.159794 | 0.389503 |
| riboflavin 4  | 0.223377 | 0.31383  | 0.158031 | 0.359673 |
| riboflavin 5  | 0.227513 | 0.324397 | 0.159269 | 0.365854 |
| cholic acid 1 | 0.186667 | 0.176966 | 0.232    | 0.2      |
| cholic acid 2 | 0.189474 | 0.160105 | 0.233244 | 0.228495 |
| cholic acid 3 | 0.187831 | 0.16     | 0.213542 | 0.223404 |
| cholic acid 4 | 0.18617  | 0.163102 | 0.231608 | 0.213333 |
| cholic acid 5 | 0.195187 | 0.16129  | 0.224    | 0.2      |

**Table S3.** Results of PCA analysis of the data of the four sensors (data shown in Table S1).

| Observation     | F1     | F2     | F3     | F4     |
|-----------------|--------|--------|--------|--------|
| buffer 1        | 0.262  | 2.867  | -0.323 | -0.071 |
| buffer 2        | 0.074  | 2.691  | -0.363 | -0.252 |
| buffer 3        | -0.228 | 1.789  | -0.359 | -0.039 |
| buffer 4        | -0.091 | 1.933  | -0.419 | -0.059 |
| buffer 5        | -0.172 | 2.103  | -0.412 | -0.160 |
| 15estradiol 1   | 0.945  | -0.928 | -1.196 | -0.231 |
| 15estradiol 2   | 1.152  | -0.682 | -1.299 | -0.007 |
| 15estradiol 3   | 1.173  | -0.914 | -1.244 | 0.165  |
| 15estradiol 4   | 1.334  | -0.855 | -1.277 | -0.047 |
| 15estradiol 5   | 1.043  | -0.659 | -1.331 | -0.353 |
| 20estradiol 1   | 4.087  | -0.252 | 0.610  | -0.204 |
| 20estradiol 2   | 4.066  | -0.047 | 0.583  | -0.257 |
| 20estradiol 3   | 4.137  | 0.078  | 0.722  | -0.244 |
| 20estradiol 4   | 3.670  | -0.183 | 0.605  | -0.310 |
| 20estradiol 5   | 3.800  | -0.267 | 0.737  | -0.169 |
| 15adenosine 1   | -0.089 | 0.306  | -0.497 | 0.253  |
| 15adenosine 2   | -0.088 | 0.428  | -0.450 | 0.432  |
| 15adenosine 3   | -0.248 | 0.271  | -0.341 | 0.536  |
| 15adenosine 4   | -0.050 | 0.182  | -0.424 | 0.624  |
| 15adenosine 5   | -0.087 | 0.544  | -0.379 | 0.326  |
| 20adenosine 1   | 0.263  | 0.107  | 0.542  | 0.659  |
| 20adenosine 2   | 0.018  | -0.128 | 0.683  | 0.423  |
| 20adenosine 3   | 0.155  | -0.051 | 0.589  | 0.601  |
| 20adenosine 4   | -0.114 | 0.053  | 0.517  | 0.670  |
| 20adenosine 5   | 0.063  | -0.053 | 0.554  | 0.700  |
| 15riboflavin 1  | -1.312 | -0.905 | -0.083 | -0.551 |
| 15riboflavin 2  | -1.447 | -0.875 | -0.141 | -0.510 |
| 15riboflavin 3  | -1.340 | -0.753 | -0.052 | -0.020 |
| 15riboflavin 4  | -1.320 | -0.956 | 0.133  | -0.270 |
| 15riboflavin 5  | -1.275 | -0.807 | -0.109 | -0.094 |
| 20riboflavin 1  | -0.631 | -0.980 | 0.058  | 0.278  |
| 20riboflavin 2  | -0.730 | -0.923 | 0.108  | 0.179  |
| 20riboflavin 3  | -0.661 | -0.930 | 0.033  | 0.178  |
| 20riboflavin 4  | -0.786 | -0.933 | 0.115  | 0.030  |
| 20riboflavin 5  | -0.702 | -0.942 | 0.095  | 0.016  |
| 15cholic acid 1 | -1.775 | 0.389  | 0.434  | -0.428 |
| 15cholic acid 2 | -1.703 | 0.418  | 0.501  | -0.233 |
| 15cholic acid 3 | -1.804 | 0.163  | 0.517  | -0.221 |
| 15cholic acid 4 | -1.773 | 0.402  | 0.479  | -0.312 |

|                 |        |        |       |        |
|-----------------|--------|--------|-------|--------|
| 15cholic acid 5 | -1.819 | 0.301  | 0.561 | -0.388 |
| 20cholic acid 1 | -1.282 | -0.158 | 0.247 | -0.100 |
| 20cholic acid 2 | -1.023 | -0.211 | 0.288 | 0.018  |
| 20cholic acid 3 | -1.274 | -0.298 | 0.188 | -0.008 |
| 20cholic acid 4 | -1.336 | -0.237 | 0.497 | -0.402 |
| 20cholic acid 5 | -1.081 | -0.102 | 0.300 | -0.149 |

**Table S4.** Results of PCA analysis of the data of the three sensors (without sensor ABA-AuNPs, data shown in Table S1).

|                | F1     | F2     | F3     |
|----------------|--------|--------|--------|
| buffer 1       | 0.581  | 19.388 | 0.788  |
| buffer 2       | 0.312  | 17.148 | 2.579  |
| buffer 3       | 0.044  | 7.433  | 0.631  |
| buffer 4       | 0.143  | 8.592  | 0.907  |
| buffer 5       | 0.093  | 10.313 | 1.755  |
| 15estradiol 1  | 1.697  | 3.276  | 5.957  |
| 15estradiol 2  | 2.612  | 2.189  | 3.165  |
| 15estradiol 3  | 2.589  | 3.400  | 1.119  |
| 15estradiol 4  | 3.018  | 3.069  | 3.485  |
| 15estradiol 5  | 2.170  | 2.013  | 9.554  |
| 20estradiol 1  | 10.564 | 0.199  | 0.237  |
| 20estradiol 2  | 10.640 | 0.016  | 0.059  |
| 20estradiol 3  | 10.700 | 0.011  | 0.237  |
| 20estradiol 4  | 8.234  | 0.094  | 0.003  |
| 20estradiol 5  | 8.601  | 0.178  | 0.605  |
| 15adenosine 1  | 0.073  | 0.111  | 0.029  |
| 15adenosine 2  | 0.088  | 0.273  | 0.774  |
| 15adenosine 3  | 0.009  | 0.094  | 2.000  |
| 15adenosine 4  | 0.103  | 0.016  | 2.668  |
| 15adenosine 5  | 0.065  | 0.537  | 0.348  |
| 20adenosine 1  | 0.008  | 0.061  | 10.202 |
| 20adenosine 2  | 0.077  | 0.003  | 6.445  |
| 20adenosine 3  | 0.004  | 0.000  | 9.319  |
| 20adenosine 4  | 0.056  | 0.031  | 10.050 |
| 20adenosine 5  | 0.011  | 0.000  | 11.237 |
| 15riboflavin 1 | 1.821  | 1.756  | 4.704  |
| 15riboflavin 2 | 2.039  | 1.664  | 4.465  |
| 15riboflavin 3 | 1.610  | 1.251  | 0.043  |
| 15riboflavin 4 | 2.022  | 1.875  | 0.692  |
| 15riboflavin 5 | 1.444  | 1.478  | 0.301  |



|                 |       |       |       |
|-----------------|-------|-------|-------|
| 20riboflavin 1  | 0.444 | 2.276 | 1.223 |
| 20riboflavin 2  | 0.629 | 1.939 | 0.654 |
| 20riboflavin 3  | 0.481 | 2.035 | 0.491 |
| 20riboflavin 4  | 0.768 | 1.934 | 0.074 |
| 20riboflavin 5  | 0.631 | 2.000 | 0.040 |
| 15cholic acid 1 | 3.387 | 0.736 | 1.184 |
| 15cholic acid 2 | 3.134 | 0.816 | 0.078 |
| 15cholic acid 3 | 3.607 | 0.262 | 0.042 |
| 15cholic acid 4 | 3.380 | 0.777 | 0.362 |
| 15cholic acid 5 | 3.804 | 0.569 | 0.574 |
| 20cholic acid 1 | 1.720 | 0.010 | 0.009 |
| 20cholic acid 2 | 1.181 | 0.039 | 0.173 |
| 20cholic acid 3 | 1.622 | 0.120 | 0.025 |
| 20cholic acid 4 | 2.431 | 0.018 | 0.681 |
| 20cholic acid 5 | 1.351 | 0.000 | 0.034 |
